# Supplementary material
Source: PubMed Central journal article supplement (PMC8117758)
Supplement: AEM.00242-21-s0001.pdf [file AEM.00242-21-s0001.pdf]

Local adaptation of *Legionella pneumophila* within a hot distribution water system increase resistance to copper

Supplemental Material

Table S1: Mean culture count results (n = 3) for the controls without copper over the duration of the assay

Table S2: Comparison of 45 isolate pairs by a one-way ANOVA analysis

Table S3: Percent viability measured in the control water for all tested strains

Table S4: Single nucleotides polymorphism identified

Table S5: Concentration of the ions added to Milli-Q water buffered to pH 7.6. Ion concentration was obtained from the Montreal City water quality report (Ville de Montréal, 2015)

Table S6: Strains included in the phylogenetic analysis

Figure S1: High-level phylogenetic tree comparing 96 completed *L. pneumophila* genomes, including, Philadelphia-1, Lens, Corby, Lorraine and Paris

Table S1: Mean culture count results (n = 3) for the controls without copper over the duration of the assay

| Isolate ID | Sampling time (days) |         |         |         |         |         |         |
|------------|----------------------|---------|---------|---------|---------|---------|---------|
|            | 0                    | 1       | 2       | 3       | 7       | 14      | 28      |
| JR32       | 1.5E+08              | 1.2E+08 | 1.3E+08 | 1.6E+08 | 1.5E+08 | 1.1E+08 | 2.5E+07 |
| ID67501-2  | 7.0E+08              | 3.7E+08 | 7.0E+08 | 8.7E+08 | 5.7E+08 | 4.7E+08 | 9.3E+07 |
| ID76826-3  | 7.0E+08              | 3.7E+08 | 7.0E+08 | 4.7E+08 | 3.7E+08 | 1.8E+08 | 1.7E+08 |
| ID87726-5  | 7.0E+08              | 3.7E+08 | 7.0E+08 | 7.7E+08 | 1.1E+09 | 3.7E+08 | 1.5E+08 |
| ID144141   | 1.9E+08              | 1.6E+08 | 1.3E+08 | 1.1E+08 | 1.2E+08 | 1.5E+08 | 8.0E+07 |
| ID135110   | 1.4E+07              | 1.2E+07 | 1.1E+07 | 9.7E+06 | 7.3E+06 | 5.7E+06 | 2.4E+06 |
| ID144150   | 1.5E+08              | 1.2E+08 | 1.3E+08 | 1.6E+08 | 1.5E+08 | 1.7E+08 | 8.3E+07 |
| ID120145   | 1.3E+08              | 1.6E+08 | 1.7E+08 | 1.1E+08 | 1.2E+08 | 1.2E+08 | 1.7E+07 |
| ID120112   | 1.9E+08              | 1.6E+08 | 1.3E+08 | 1.1E+08 | 1.2E+08 | 2.2E+08 | 1.6E+08 |
| ID120292   | 1.9E+08              | 1.6E+08 | 1.3E+08 | 1.1E+08 | 1.2E+08 | 2.3E+08 | 1.9E+08 |

Table S2: Comparison of 45 isolate pairs by a Kruskal Wallis analysis

| Uncorrected Dunn's test | Mean rank diff. | Significant? | Summary | Individual P Value |     |
|-------------------------|-----------------|--------------|---------|--------------------|-----|
| JR32 vs. 1185.W.F       | 9.333           | No           | ns      | 0.1938             | A-B |
| JR32 vs. 1427.B.F       | 5.667           | No           | ns      | 0.4301             | A-C |
| JR32 vs. 378.W.F        | 18.33           | Yes          | *       | 0.0107             | A-D |
| JR32 vs. 1427.W.HE      | 21.33           | Yes          | **      | 0.003              | A-E |
| JR32 vs. 1427.C         | 15.33           | Yes          | *       | 0.0328             | A-F |
| JR32 vs. 1427.B.HE      | -5.667          | No           | ns      | 0.4301             | A-G |
| JR32 vs. 284.W          | 12.33           | No           | ns      | 0.0859             | A-H |
| JR32 vs. 62.C           | 3.667           | No           | ns      | 0.6097             | A-I |
| JR32 vs. 62.W           | -2              | No           | ns      | 0.7807             | A-J |
| 1185.W.F vs. 1427.B.F   | -3.667          | No           | ns      | 0.6097             | B-C |
| 1185.W.F vs. 378.W.F    | 9               | No           | ns      | 0.2102             | B-D |
| 1185.W.F vs. 1427.W.HE  | 12              | No           | ns      | 0.0948             | B-E |
| 1185.W.F vs. 1427.C     | 6               | No           | ns      | 0.4035             | B-F |
| 1185.W.F vs. 1427.B.HE  | -15             | Yes          | *       | 0.0368             | B-G |
| 1185.W.F vs. 284.W      | 3               | No           | ns      | 0.6762             | B-H |
| 1185.W.F vs. 62.C       | -5.667          | No           | ns      | 0.4301             | B-I |
| 1185.W.F vs. 62.W       | -11.33          | No           | ns      | 0.1146             | B-J |
| 1427.B.F vs. 378.W.F    | 12.67           | No           | ns      | 0.0778             | C-D |
| 1427.B.F vs. 1427.W.HE  | 15.67           | Yes          | *       | 0.0292             | C-E |
| 1427.B.F vs. 1427.C     | 9.667           | No           | ns      | 0.1783             | C-F |
| 1427.B.F vs. 1427.B.HE  | -11.33          | No           | ns      | 0.1146             | C-G |
| 1427.B.F vs. 284.W      | 6.667           | No           | ns      | 0.3533             | C-H |
| 1427.B.F vs. 62.C       | -2              | No           | ns      | 0.7807             | C-I |
| 1427.B.F vs. 62.W       | -7.667          | No           | ns      | 0.2858             | C-J |
| 378.W.F vs. 1427.W.HE   | 3               | No           | ns      | 0.6762             | D-E |
| 378.W.F vs. 1427.C      | -3              | No           | ns      | 0.6762             | D-F |
| 378.W.F vs. 1427.B.HE   | -24             | Yes          | ***     | 0.0008             | D-G |
| 378.W.F vs. 284.W       | -6              | No           | ns      | 0.4035             | D-H |
| 378.W.F vs. 62.C        | -14.67          | Yes          | *       | 0.0411             | D-I |
| 378.W.F vs. 62.W        | -20.33          | Yes          | **      | 0.0046             | D-J |
| 1427.W.HE vs. 1427.C    | -6              | No           | ns      | 0.4035             | E-F |
| 1427.W.HE vs. 1427.B.HE | -27             | Yes          | ***     | 0.0002             | E-G |
| 1427.W.HE vs. 284.W     | -9              | No           | ns      | 0.2102             | E-H |
| 1427.W.HE vs. 62.C      | -17.67          | Yes          | *       | 0.0139             | E-I |
| 1427.W.HE vs. 62.W      | -23.33          | Yes          | **      | 0.0012             | E-J |
| 1427.C vs. 1427.B.HE    | -21             | Yes          | **      | 0.0035             | F-G |
| 1427.C vs. 284.W        | -3              | No           | ns      | 0.6762             | F-H |
| 1427.C vs. 62.C         | -11.67          | No           | ns      | 0.1043             | F-I |
| 1427.C vs. 62.W         | -17.33          | Yes          | *       | 0.0158             | F-J |
| 1427.B.HE vs. 284.W     | 18              | Yes          | *       | 0.0122             | G-H |
| 1427.B.HE vs. 62.C      | 9.333           | No           | ns      | 0.1938             | G-I |
| 1427.B.HE vs. 62.W      | 3.667           | No           | ns      | 0.6097             | G-J |
| 284.W vs. 62.C          | -8.667          | No           | ns      | 0.2276             | H-I |
| 284.W vs. 62.W          | -14.33          | Yes          | *       | 0.046              | H-J |
| 62.C vs. 62.W           | -5.667          | No           | ns      | 0.4301             | I-J |

Table S3: Percent viability measured in the control water for all tested strains

| Time | JR32 | 1185.W.F | 378.W.F | 1427.C | 1427.B.F | 1427.W.HE | 1427.B.HE | 284.W | 62.C | 62.W |
|------|------|----------|---------|--------|----------|-----------|-----------|-------|------|------|
| 1h   | 90%  | 99%      | 92%     | 49%    | 99%      | 96%       | 99%       | 97%   | 80%  | 81%  |
| 24h  | 83%  | 100%     | 77%     | 45%    | 82%      | 97%       | 100%      | 96%   | 93%  | 89%  |
| 48h  | 81%  | n.m.     | 67%     | 100%   | 91%      | 98%       | 100%      | 96%   | 87%  | 96%  |
| 72h  | 87%  | 77%      | 88%     | 71%    | 100%     | 97%       | 100%      | 97%   | 76%  | 87%  |
| 168h | 86%  | 86%      | 80%     | 92%    | 99%      | 88%       | n.m.      | 95%   | 84%  | 86%  |
| 336h | 86%  | 76%      | 75%     | 97%    | 98%      | n.m.      | 99%       | 96%   | 84%  | 79%  |
| 672h | 79%  | 78%      | 89%     | 97%    | 97%      | n.m.      | 96%       | 98%   | 70%  | 96%  |

Table S4: Single nucleotides polymorphism identified

| Position in NC_021350 | Isolate Strain |          |           |        |           | Annotation             | Gene                          | Description                                                           |
|-----------------------|----------------|----------|-----------|--------|-----------|------------------------|-------------------------------|-----------------------------------------------------------------------|
|                       | NC_021350      | 1427.B.F | 1427.B.HE | 1427.C | 1427.W.HE |                        |                               |                                                                       |
| 22618                 | A              | A        | A         | G      | A         | K41R (AAA→AGA)         | LP6_RS00090 →                 | TolC family protein                                                   |
| 138963                | G              | A        | G         | G      | G         | M172I (ATG→ATA)        | LP6_RS00620 →                 | ABC transporter permease subunit                                      |
| 238758                | A              | A        | G         | G      | G         | Y42C (TAT→TGT)         | LP6_RS01070 →                 | protein kinase                                                        |
| 305099                | G              | G        | A         | G      | G         | A175T (GCC→ACC)        | LP6_RS01320 →                 | hypothetical protein                                                  |
| 400586                | T              | T        | A         | T      | A         | K728* (AAA→TAA)        | LP6_RS01805 ←                 | Ipg0365 family Dot/Icm T4SS effector                                  |
| 676192                | G              | A        | A         | A      | G         | G514S (GGT→AGT)        | wipB →                        | Dot/Icm T4SS effector WipB                                            |
| 706918                | T              | T        | T         | C      | T         | D30G (GAT→GGT)         | rpe ←                         | ribulose phosphate 3 epimerase                                        |
| 863301                | T              | T        | C         | C      | C         | intergenic (+31/ 83)   | LP6_RS03955 → / → LP6_RS03960 | hypothetical protein/IS4 family transposase                           |
| 941080                | A              | A        | A         | T      | A         | E234D (GAA→GAT)        | LP6_RS04325 →                 | cytochrome c biogenesis protein CcsA                                  |
| 1024041               | A              | A        | G         | A      | G         | H429H (CAT→CAC)        | lidA ←                        | Dot/Icm T4SS effector LidA                                            |
| 1051477               | T              | A        | T         | T      | T         | F577L (TTT→TTA)        | ligA →                        | NAD dependent DNA ligase LigA                                         |
| 1114928               | C              | C        | T         | T      | T         | intergenic (+168/ 104) | prs → / → LP6_RS05135         | ribose phosphate pyrophosphokinase/copper translocating P type ATPase |
| 1124675               | G              | G        | A         | A      | A         | L133L (TTG→TTA)        | LP6_RS05165 →                 | hypothetical protein                                                  |
| 1203009               | G              | G        | A         | A      | A         | A154T (GCT→ACT)        | LP6_RS05520 →                 | efflux RND transporter periplasmic adaptor subunit                    |
| 1342177               | C              | T        | T         | T      | C         | E203E (GAG→GAA)        | LP6_RS06130 ←                 | LysE family transporter                                               |
| 1434172               | G              | G        | A         | G      | G         | E563E (GAG→GAA)        | LP6_RS06610 →                 | Tfp pilus assembly protein FimV (twitching motility)                  |
| 1443541               | G              | A        | A         | A      | G         | intergenic (+64/ 102)  | LP6_RS06650 → / → LP6_RS06655 | cysteine tRNA ligase/DUF3413 domain containing protein                |
| 1468941               | T              | T        | A         | A      | A         | Q144L (CAA→CTA)        | lbtU ←                        | siderophore legiobactin import outer membrane protein LbtU            |
| 1503327               | A              | G        | A         | A      | A         | intergenic ( 69/+84)   | LP6_RS06885 ← / ← sidG        | SGNH/GDSL hydrolase family protein/Dot/Icm T4SS effector SidG         |
| 1688131               | T              | T        | T         | C      | T         | F835F (TTT→TTC)        | LP6_RS07705 →                 | EAL domain containing protein                                         |
| 1902159               | C              | T        | T         | T      | C         | A513V (GCT→GTT)        | LP6_RS08630 →                 | kinectin 1                                                            |
| 1903355               | G              | G        | A         | A      | A         | D306N (GAT→AAT)        | ppeB →                        | Dot/Icm T4SS effector PpeB                                            |
| 2011194               | A              | A        | A         | T      | T         | intergenic (+178/+7)   | rvfA → / ← mavB               | Dot/Icm T4SS effector RvfA/Dot/Icm T4SS effector MavB                 |
| 2011196               | T              | T        | T         | G      | G         | intergenic (+180/+5)   | rvfA → / ← mavB               | Dot/Icm T4SS effector RvfA/Dot/Icm T4SS effector MavB                 |
| 2486659               | T              | T        | C         | C      | C         | S263S (TCA→TCG)        | LP6_RS11310 ←                 | rod shape determining protein                                         |
| 2571690               | G              | G        | A         | A      | A         | I196I (ATC→ATI)        | LP6_RS11625 ←                 | hypothetical protein                                                  |
| 2764264               | A              | A        | C         | A      | A         | intergenic (+42/+68)   | LP6_RS12515 → / ← LP6_RS12520 | hypothetical protein/M23 family metalloproteinase                     |
| 3050179               | A              | A        | G         | A      | G         | F47S (TIT→TCT)         | LP6_RS13810 ←                 | phenylalanine 4 monooxygenase                                         |
| 3421575               | G              | A        | G         | G      | G         | A841V (GCT→GTT)        | LP6_RS15515 ←                 | Ipg2975 family Dot/Icm T4SS effector                                  |

Table S5: Concentration of the ions added to Milli-Q water buffered to pH 7.6. Ion concentration was obtained from the Montreal City water quality report (Ville de Montréal, 2015)<sup>1</sup>

|                            | Final Concentration (mg/L) | Ion source                                 | Salt solution concentration (mg/L) | Volume of salt solution added for final volume of 1L |
|----------------------------|----------------------------|--------------------------------------------|------------------------------------|------------------------------------------------------|
| Aluminum                   | 0.07                       | $KAl(SO_4)_2 \bullet 12H_2O$               | 1226                               | 1                                                    |
| Calcium                    | 31.95                      | $CaCl_2 \bullet 2H_2O$                     | 117189                             | 1                                                    |
| Chloride                   | 24.70                      | (KCl + $CaCl_2 \bullet 2H_2O$ )            | -                                  | -                                                    |
| Fluoride                   | 0.13                       | NaF                                        | 287                                | 1                                                    |
| Iron                       | 0.02                       | $FeCl_3 \bullet 6H_2O$                     | 960                                | 0,1                                                  |
| Magnesium                  | 8.21                       | $MgSO_4$                                   | 40648                              | 1                                                    |
| Nitrate (NO <sub>3</sub> ) | 0.33                       | $Ca(NO_3)_2 \bullet 4H_2O$                 | 628                                | 1                                                    |
| Potassium                  | 1.58                       | KCl                                        | 3012                               | 1                                                    |
| Sulfate                    | 22.15                      | $KAl(SO_4)_2 \bullet 12H_2O$<br>+ $MgSO_4$ | -                                  | -                                                    |

<sup>1</sup>Ville de Montréal, 2015. Qualité de l'eau potable produite par les usines Atwater et Charles-J.-Des-Baillets et distribuée en réseau, p. 6.

Table S6: Strains included in the phylogenetic analysis

| Accession   | Name               | Included in Fig. 4 | Accession   | Name          | Included in Fig. 4 |
|-------------|--------------------|--------------------|-------------|---------------|--------------------|
| NC_002942   | Philadelphia_1     | Yes                | NZ_CP015949 | E3_N          | No                 |
| NC_016811   | ATCC_43290         | Yes                | NZ_CP015950 | E4_N          | No                 |
| NC_020521   | LPE509             | Yes                | NZ_CP015951 | E5_N          | No                 |
| NC_021350   | Thunder_Bay        | Yes                | NZ_CP015953 | E6_N          | No                 |
| NZ_CP015927 | Philadelphia_1_ATC | Yes                | NZ_CP015954 | E7_O          | No                 |
| NZ_CP015928 | Philadelphia_1_CDC | Yes                | NZ_CP015955 | E8_O          | No                 |
| NZ_CP015929 | Philadelphia_2     | Yes                | NZ_CP015956 | E9_O          | No                 |
| NZ_CP015930 | Philadelphia_3     | Yes                | NZ_CP016029 | Pontiac       | No                 |
| NZ_CP015931 | Philadelphia_4     | Yes                | NZ_CP016030 | OLDA          | No                 |
| NZ_CP021267 | Burlington_1       | Yes                | NZ_CP016868 | FF1102        | No                 |
| NZ_CP045974 | SBT211             | Yes                | NZ_CP016870 | FF1103        | No                 |
| NZ_LR133933 | NCTC12180          | Yes                | NZ_CP016872 | FF1104        | No                 |
| NZ_LR134332 | NCTC11193          | Yes                | NZ_CP016873 | FF1105        | No                 |
| NZ_LT598657 | Lpm7613            | Yes                | NZ_CP016874 | FFI329        | No                 |
| NZ_LT632616 | ST37               | Yes                | NZ_CP016876 | FFI337        | No                 |
|             | 1427.B.F           | Yes                | NZ_CP017457 | Detroit-1     | No                 |
|             | 1427.W.HE          | Yes                | NZ_CP017458 | Dallas_1E     | No                 |
|             | 1427.B.HE          | Yes                | NZ_CP017601 | D6026         | No                 |
|             | 1427.C             | Yes                | NZ_CP017602 | D5945         | No                 |
| NC_006368   | Paris              | No                 | NZ_CP021256 | D-4954        | No                 |
| NC_006369   | Lens               | No                 | NZ_CP021257 | Lansing_3     | No                 |
| NC_009494   | Corby              | No                 | NZ_CP021258 | D-5744        | No                 |
| NC_014125   | 2300/99_Alcoy      | No                 | NZ_CP021259 | D-7708        | No                 |
| NC_018139   | Lorraine           | No                 | NZ_CP021260 | NY24          | No                 |
| NC_018140   | HL06041035         | No                 | NZ_CP021261 | NY23          | No                 |
| NZ_CP011105 | L10-023            | No                 | NZ_CP021262 | U8W           | No                 |
| NZ_CP012019 | Toronto-2005       | No                 | NZ_CP021263 | D-3137        | No                 |
| NZ_CP014255 | F-4185             | No                 | NZ_CP021264 | D-5387        | No                 |
| NZ_CP014256 | D-7158             | No                 | NZ_CP021265 | Los_Angeles_1 | No                 |
| NZ_CP014257 | D-7119             | No                 | NZ_CP021266 | Knoxville_1   | No                 |
| NZ_CP014759 | F4468              | No                 | NZ_CP021268 | Birmingham_1  | No                 |
| NZ_CP014760 | F4469              | No                 | NZ_CP021269 | Bellingham_1  | No                 |
| NZ_CP015342 | D-7632             | No                 | NZ_CP021270 | D-7787        | No                 |
| NZ_CP015343 | D-7631             | No                 | NZ_CP021272 | D-5265        | No                 |
| NZ_CP015344 | D-7630             | No                 | NZ_CP021274 | D-4040        | No                 |
| NZ_CP015925 | E10_P              | No                 | NZ_CP021277 | D-4058        | No                 |
| NZ_CP015926 | E11_U              | No                 | NZ_CP021279 | F-4198        | No                 |
| NZ_CP015932 | C1_S               | No                 | NZ_CP021281 | Flint_2       | No                 |
| NZ_CP015933 | C2_S               | No                 | NZ_CP021283 | Allentown_1   | No                 |
| NZ_CP015934 | C3_O               | No                 | NZ_CP021286 | Albuquerque_1 | No                 |
| NZ_CP015935 | C4_S               | No                 | NZ_CP040987 | FDAARGOS_779  | No                 |
| NZ_CP015936 | C5_P               | No                 | NZ_LR134176 | NCTC12179     | No                 |
| NZ_CP015937 | C6_S               | No                 | NZ_LR134380 | NCTC12273     | No                 |
| NZ_CP015938 | C7_O               | No                 | NZ_LS483410 | NCTC11404     | No                 |
| NZ_CP015939 | C8_S               | No                 | NZ_LS483412 | NCTC12272     | No                 |
| NZ_CP015941 | C9_S               | No                 | NZ_LT632614 | ST62          | No                 |
| NZ_CP015944 | C10_S              | No                 | NZ_LT632615 | ST23          | No                 |
| NZ_CP015945 | C11_O              | No                 | NZ_LT632617 | ST42          | No                 |
| NZ_CP015946 | E1_P               | No                 | NZ_LT906452 | NCTC11985     | No                 |
| NZ_CP015947 | E2_N               | No                 | NZ_LT906476 | NCTC11286     | No                 |

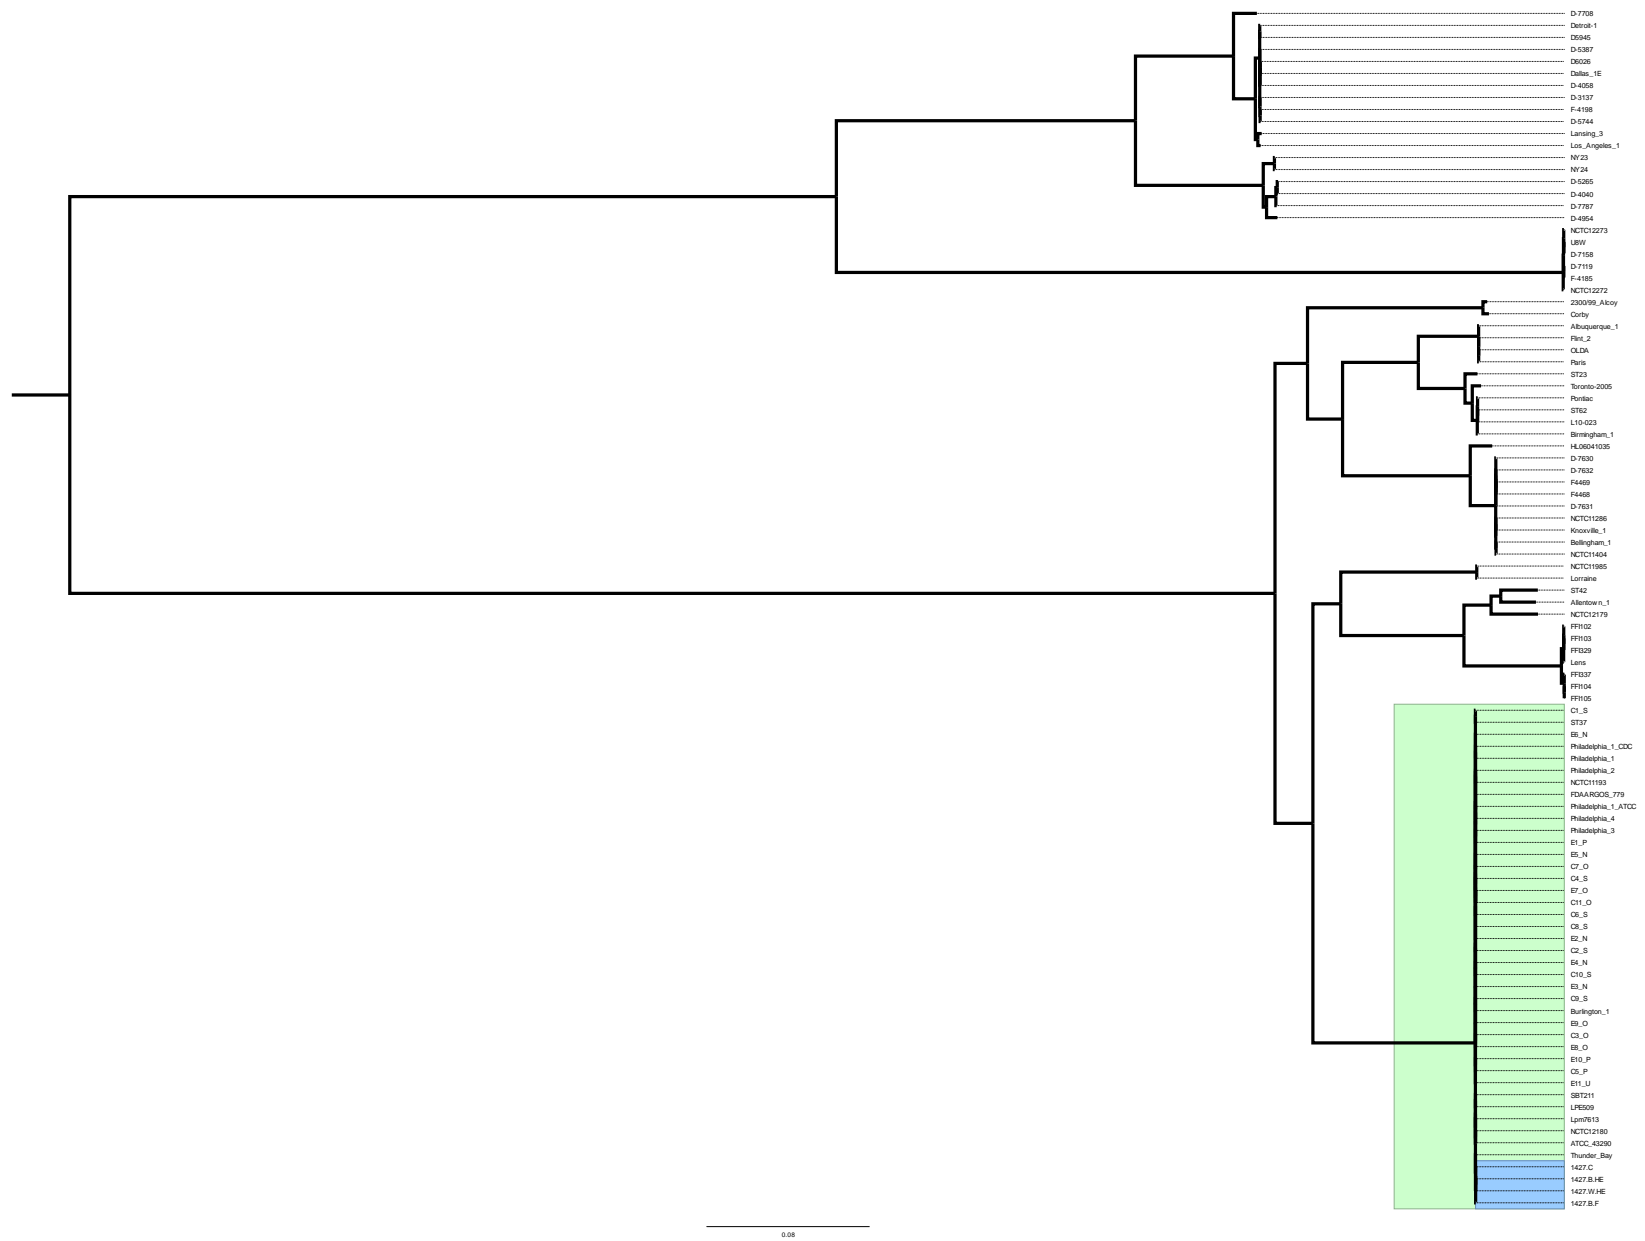

Figure S1: High-level phylogenetic tree comparing 96 completed *L. pneumophila* genomes, including, Philadelphia-1, Lens, Corby, Lorraine and Paris
